# Supplementary material
Source: publisher site journal article supplement (https://www.dovepress.com/article/160196)
Supplement: Supplementary file 1 [file get_supplementary_file.php]

Table S1 The clinicopathological characteristics of 197 CRC patients in TMA

| Sample ID | Status | Survival time (months) | Gender | Age (years) | BMI   | Differentiation | Tumor size (cm) | AJCC stage | T stage | N stage | M stage | COL10A1 expression |
|-----------|--------|------------------------|--------|-------------|-------|-----------------|-----------------|------------|---------|---------|---------|--------------------|
| 33702928  | Dead   | 24                     | Male   | 55          | 22.86 | Moderate        | 5               | III C      | T4      | N2      | M0      | High               |
| 34052239  | Alive  | 11                     | Female | 34          | 22.58 | Poor            | 2.5             | II B       | T4      | N0      | M0      | Low                |
| ZA3685975 | Alive  | 36                     | Female | 46          | 26.67 | Moderate        | 4               | II B       | T4      | N0      | M0      | Low                |
| 34056080  | Alive  | 35                     | Female | 59          | 23.61 | Moderate        | 3.5             | I          | T1      | N0      | M0      | High               |
| ZA4300968 | Alive  | 35                     | Male   | 21          | 23.53 | Moderate        | 6.5             | II B       | T4      | N0      | M0      | Low                |
| 34057344  | Alive  | 36                     | Male   | 46          | 29.35 | Moderate        | 4               | II B       | T4      | N0      | M0      | Low                |
| 34047328  | Dead   | 23                     | Female | 26          | 18.75 | Poor            | 9               | III B      | T4      | N1      | M0      | High               |
| 34050451  | Dead   | 30                     | Female | 41          | 25.48 | Well            | 5.5             | IV         | T4      | N1      | M1      | High               |
| 34060237  | Alive  | 36                     | Male   | 55          | 19.47 | Moderate        | 4.6             | III B      | T3      | N1      | M0      | Low                |
| ZA4299102 | Dead   | 29                     | Female | 65          | 26.72 | Moderate        | 3.5             | II B       | T4      | N0      | M0      | High               |
| ZA4301521 | Alive  | 36                     | Female | 43          | 20    | Moderate        | 1.6             | II B       | T4      | N0      | M0      | Low                |
| ZA4458832 | Alive  | 34                     | Male   | 64          | 21.45 | Well            | 3               | IV         | T4      | N0      | M1      | Low                |
| 34060131  | Alive  | 36                     | Female | 49          | 18.8  | Well            | 5               | II B       | T4      | N0      | M0      | Low                |
| 34060302  | Dead   | 8                      | Male   | 64          | 26.81 | Moderate        | 3               | II B       | T4      | N0      | M0      | High               |
| 34048331  | Alive  | 36                     | Male   | 57          | 20.55 | Moderate        | 3               | II B       | T4      | N0      | M0      | Low                |
| 34060592  | Alive  | 37                     | Male   | 60          | 18.42 | Poor            | 2.8             | III C      | T4      | N2      | M0      | Low                |
| ZA4300182 | Dead   | 11                     | Female | 73          | 22.1  | Poor            | 4               | IV         | T4      | N1      | M1      | High               |
| 34058136  | Dead   | 13                     | Female | 66          | 32.85 | Moderate        | 5               | IV         | T4      | N1      | M1      | High               |
| YB0116032 | Alive  | 37                     | Male   | 71          | 24.73 | Well            | 1.5             | II B       | T4      | N0      | M0      | Low                |
| 34061235  | Alive  | 37                     | Female | 44          | 26.77 | Well            | 3               | I          | T2      | N0      | M0      | Low                |
| ZA4439175 | Dead   | 6                      | Male   | 51          | 24.09 | Moderate        | 4.3             | III C      | T4      | N2      | M0      | High               |
| ZA4296735 | Alive  | 37                     | Male   | 63          | 25.71 | Moderate        | 6.2             | II A       | T3      | N0      | M0      | Low                |
| ZA3704720 | Alive  | 37                     | Female | 30          | 18.73 | Poor            | 3.5             | III A      | T2      | N1      | M0      | Low                |

|           |       |    |        |    |       |          |     |              |    |    |    |      |
|-----------|-------|----|--------|----|-------|----------|-----|--------------|----|----|----|------|
| 34064915  | Alive | 37 | Male   | 33 | 20.58 | Well     | 4   | <b>II B</b>  | T4 | N0 | M0 | Low  |
| ZA4342815 | Alive | 37 | Female | 44 | 16.77 | Well     | 3   | <b>II B</b>  | T4 | N0 | M0 | High |
| 34067130  | Dead  | 3  | Male   | 61 | 21.61 | Well     | 4   | <b>IV</b>    | T4 | N1 | M1 | High |
| ZA4308146 | Alive | 37 | Male   | 48 | 27.55 | Well     | 2   | <b>III B</b> | T4 | N1 | M0 | Low  |
| ZA4299478 | Alive | 37 | Male   | 55 | 20.2  | Moderate | 8   | <b>III B</b> | T4 | N1 | M0 | Low  |
| 34068635  | Alive | 10 | Female | 68 | 19.63 | Moderate | 2.5 | <b>II B</b>  | T4 | N0 | M0 | Low  |
| ZA4267597 | Alive | 35 | Male   | 76 | 25.18 | Moderate | 2.7 | <b>I</b>     | T2 | N0 | M0 | High |
| 34070466  | Alive | 35 | Female | 65 | 20.55 | Moderate | 6   | <b>III B</b> | T4 | N1 | M1 | Low  |
| 34070776  | Alive | 31 | Male   | 38 | 26.99 | Poor     | 1.5 | <b>III B</b> | T4 | N1 | M0 | Low  |
| ZA4265934 | Alive | 35 | Female | 59 | 21.64 | Moderate | 4   | <b>I</b>     | T2 | N0 | M0 | High |
| 34023277  | Alive | 35 | Male   | 67 | 23.93 | Moderate | 9   | <b>I</b>     | T2 | N0 | M0 | Low  |
| 34013781  | Alive | 35 | Male   | 58 | 21.63 | Moderate | 1   | <b>II A</b>  | T3 | N0 | M0 | Low  |
| 34071137  | Alive | 35 | Male   | 66 | 26.64 | Moderate | 4   | <b>II B</b>  | T4 | N0 | M0 | High |
| ZA4266389 | Alive | 35 | Male   | 75 | 25.61 | Moderate | 4   | <b>I</b>     | T2 | N0 | M0 | High |
| ZA4264443 | Alive | 35 | Male   | 58 | 25.95 | Moderate | 1   | <b>III C</b> | T2 | N2 | M0 | Low  |
| 34069727  | Alive | 35 | Female | 39 | 26.3  | Well     | 1   | <b>III C</b> | T4 | N2 | M0 | Low  |
| 34073843  | Alive | 35 | Male   | 50 | 21.05 | Moderate | 5.5 | <b>II B</b>  | T4 | N0 | M0 | Low  |
| QA0026867 | Alive | 35 | Male   | 74 | 24.74 | Well     | 4   | <b>II B</b>  | T3 | N1 | M0 | Low  |
| 34072791  | Dead  | 32 | Male   | 48 | 24.98 | Moderate | 9   | <b>IV</b>    | T4 | N2 | M1 | High |
| ZA4413631 | Alive | 35 | Male   | 63 | 23.01 | Moderate | 2.5 | <b>II A</b>  | T3 | N0 | M0 | Low  |
| 34075243  | Dead  | 10 | Male   | 52 | 29.41 | Moderate | 7   | <b>IV</b>    | T3 | N2 | M1 | Low  |
| ZA4287705 | Alive | 35 | Male   | 64 | 20.73 | Moderate | 3.6 | <b>II B</b>  | T4 | N0 | M0 | Low  |
| ZA3137069 | Dead  | 10 | Male   | 73 | 23.31 | Moderate | 3.5 | <b>IV</b>    | T4 | N2 | M1 | Low  |
| ZA4377310 | Dead  | 8  | Female | 80 | 18.36 | Moderate | 6   | <b>IV</b>    | T4 | N0 | M1 | Low  |
| 34063537  | Alive | 35 | Female | 58 | 30.11 | Moderate | 2   | <b>I</b>     | T2 | N0 | M0 | Low  |
| 34072970  | Alive | 35 | Male   | 43 | 25.21 | Moderate | 2   | <b>II B</b>  | T4 | N0 | M0 | High |
| ZA4286702 | Alive | 35 | Male   | 49 | 19.92 | Well     | 7   | <b>IV</b>    | T4 | N1 | M1 | High |

|           |       |    |        |    |       |          |     |              |     |    |    |      |
|-----------|-------|----|--------|----|-------|----------|-----|--------------|-----|----|----|------|
| ZA4286776 | Dead  | 30 | Male   | 35 | 19.92 | Well     | 4   | <b>III B</b> | T4  | N1 | M0 | Low  |
| 34075085  | Dead  | 30 | Male   | 78 | 21.22 | Moderate | 3   | <b>II A</b>  | T3  | N0 | M0 | Low  |
| 34076486  | Alive | 35 | Male   | 59 | 24.24 | Moderate | 4   | <b>II B</b>  | T4  | N0 | M0 | Low  |
| QA0027075 | Alive | 35 | Female | 56 | 20.31 | Moderate | 2.5 | <b>III A</b> | T2  | N1 | M0 | Low  |
| 34077509  | Alive | 35 | Male   | 62 | 24.22 | Moderate | 6   | <b>II B</b>  | T4  | N0 | M0 | Low  |
| 34078169  | Alive | 35 | Male   | 57 | 22.14 | Well     | 7.5 | <b>I</b>     | Tis | N0 | M0 | Low  |
| 34077369  | Dead  | 26 | Male   | 57 | 24.46 | Moderate | 9   | <b>IV</b>    | T4  | N2 | M1 | Low  |
| ZA4276460 | Alive | 35 | Female | 44 | 20.2  | Well     | 4   | <b>III C</b> | T2  | N2 | M0 | High |
| QA0027125 | Alive | 35 | Male   | 64 | 25.78 | Moderate | 2.5 | <b>II B</b>  | T4  | N0 | M0 | High |
| 34077500  | Alive | 35 | Male   | 55 | 26.2  | Moderate | 5.5 | <b>I</b>     | T2  | N0 | M0 | Low  |
| ZA3456829 | Alive | 35 | Male   | 54 | 24.91 | Moderate | 7   | <b>II B</b>  | T4  | N0 | M0 | Low  |
| 34074521  | Alive | 35 | Male   | 76 | 20.83 | Well     | 3   | <b>I</b>     | T1  | N0 | M0 | Low  |
| ZA4256467 | Alive | 35 | Male   | 70 | 23.8  | Moderate | 3   | <b>I</b>     | T1  | N0 | M0 | Low  |
| 33480719  | Alive | 35 | Male   | 55 | 22    | Moderate | 8   | <b>I</b>     | T2  | N0 | M0 | Low  |
| QA0026208 | Alive | 34 | Male   | 57 | 22.58 | Well     | 3   | <b>II B</b>  | T4  | N0 | M0 | Low  |
| 33738551  | Alive | 34 | Female | 71 | 23.01 | Moderate | 4   | <b>II B</b>  | T4  | N0 | M0 | Low  |
| 34086372  | Alive | 34 | Male   | 52 | 21.26 | Moderate | 2   | <b>III B</b> | T4  | N1 | M0 | Low  |
| 34084051  | Alive | 34 | Female | 62 | 26.67 | Moderate | 2.5 | <b>III B</b> | T4  | N1 | M0 | Low  |
| 34086107  | Alive | 34 | Male   | 63 | 24.34 | Poor     | 2.5 | <b>III B</b> | T4  | N1 | M0 | High |
| 34086772  | Alive | 33 | Male   | 49 | 21.95 | Moderate | 3   | <b>III B</b> | T4  | N1 | M0 | Low  |
| 34085446  | Alive | 34 | Male   | 45 | 21.26 | Moderate | 3   | <b>II B</b>  | T4  | N0 | M0 | High |
| ZA4416372 | Alive | 34 | Male   | 48 | 26.56 | Moderate | 3   | <b>III B</b> | T3  | N1 | M0 | Low  |
| 34041719  | Alive | 31 | Male   | 49 | 19.33 | Well     | 6   | <b>II B</b>  | T4  | N0 | M0 | Low  |
| 34083819  | Alive | 34 | Male   | 57 | 22.86 | Moderate | 4   | <b>II B</b>  | T3  | N0 | M0 | High |
| 34089319  | Alive | 13 | Male   | 44 | 27.25 | Moderate | 3   | <b>II B</b>  | T4  | N0 | M0 | Low  |
| ZA4464476 | Dead  | 33 | Male   | 69 | 23.44 | Moderate | 2   | <b>II B</b>  | T4  | N0 | M0 | Low  |
| 34089620  | Alive | 33 | Female | 56 | 27.85 | Moderate | 4   | <b>III B</b> | T4  | N1 | M0 | Low  |

|           |       |    |        |    |       |          |      |              |    |    |    |      |
|-----------|-------|----|--------|----|-------|----------|------|--------------|----|----|----|------|
| 34086783  | Alive | 21 | Male   | 48 | 17.63 | Moderate | 3    | <b>II B</b>  | T4 | N0 | M0 | Low  |
| 34086866  | Alive | 30 | Female | 70 | 21.27 | Moderate | 4    | <b>II B</b>  | T4 | N0 | M0 | High |
| ZA3137081 | Dead  | 34 | Male   | 51 | 20.96 | Moderate | 8    | <b>III B</b> | T4 | N1 | M0 | Low  |
| ZA3530778 | Dead  | 32 | Male   | 74 | 25.18 | Well     | 10.5 | <b>III B</b> | T4 | N1 | M0 | Low  |
| QA0026936 | Alive | 34 | Female | 79 | 21.7  | Moderate | 4    | <b>I</b>     | T2 | N0 | M0 | Low  |
| 34091788  | Alive | 33 | Male   | 37 | 20.44 | Moderate | 3.5  | <b>II B</b>  | T4 | N0 | M0 | Low  |
| 34094911  | Alive | 33 | Male   | 32 | 20.06 | Well     | 3    | <b>I</b>     | T2 | N0 | M0 | Low  |
| 34093636  | Alive | 32 | Female | 63 | 22    | Well     | 6.5  | <b>I</b>     | T2 | N0 | M0 | Low  |
| 34096022  | Alive | 32 | Female | 47 | 26.3  | Moderate | 3    | <b>II B</b>  | T4 | N0 | M0 | Low  |
| 34096064  | Alive | 33 | Female | 65 | 23.1  | Moderate | 3    | <b>II B</b>  | T4 | N0 | M0 | Low  |
| 34095969  | Alive | 32 | Female | 68 | 21.37 | Moderate | 4    | <b>IV</b>    | T4 | N1 | M1 | Low  |
| 34096393  | Alive | 33 | Female | 62 | 25.64 | Moderate | 2.5  | <b>IV</b>    | T4 | N1 | M1 | Low  |
| QA0026775 | Alive | 33 | Male   | 46 | 27.68 | Moderate | 3    | <b>III B</b> | T4 | N1 | M0 | Low  |
| QA0026629 | Alive | 33 | Male   | 49 | 31.62 | Moderate | 1    | <b>II A</b>  | T3 | N0 | M0 | Low  |
| 34057519  | Alive | 33 | Female | 48 | 21.45 | Well     | 3    | <b>III B</b> | T4 | N1 | M0 | Low  |
| 34099588  | Alive | 33 | Female | 61 | 18    | Well     | 5.5  | <b>II B</b>  | T4 | N0 | M0 | Low  |
| 34102841  | Alive | 33 | Male   | 54 | 23    | Moderate | 3    | <b>III B</b> | T4 | N1 | M0 | High |
| 34103204  | Alive | 32 | Male   | 58 | 20.9  | Moderate | 1    | <b>II B</b>  | T4 | N0 | M0 | Low  |
| 34103115  | Alive | 32 | Female | 65 | 23.23 | Moderate | 7    | <b>III B</b> | T4 | N1 | M0 | High |
| 34106217  | Alive | 32 | Female | 63 | 26.67 | Moderate | 1.5  | <b>III B</b> | T4 | N1 | M0 | Low  |
| 34093155  | Alive | 32 | Male   | 51 | 20.62 | Moderate | 3    | <b>III B</b> | T4 | N1 | M0 | High |
| 34102631  | Dead  | 24 | Female | 65 | 28    | Well     | 5.5  | <b>III B</b> | T4 | N1 | M0 | Low  |
| ZA4249153 | Dead  | 21 | Male   | 45 | 22.76 | Moderate | 3    | <b>III B</b> | T4 | N1 | M0 | Low  |
| 34109261  | Alive | 33 | Male   | 49 | 30.41 | Moderate | 10   | <b>III B</b> | T4 | N1 | M0 | Low  |
| ZA4367280 | Alive | 33 | Female | 72 | 21.05 | Moderate | 4    | <b>III B</b> | T4 | N1 | M0 | Low  |
| 34111617  | Alive | 32 | Male   | 53 | 25.95 | Moderate | 6    | <b>II B</b>  | T4 | N0 | M0 | Low  |
| 34113045  | Alive | 32 | Male   | 58 | 22.49 | Moderate | 4    | <b>I</b>     | T2 | N0 | M0 | Low  |

|           |       |    |        |    |       |          |     |             |    |    |    |      |
|-----------|-------|----|--------|----|-------|----------|-----|-------------|----|----|----|------|
| 34110171  | Alive | 32 | Female | 44 | 19.2  | Moderate | 2.5 | <b>II B</b> | T4 | N0 | M0 | Low  |
| 34107214  | Dead  | 15 | Male   | 75 | 19.2  | Moderate | 4.2 | <b>IV</b>   | T4 | N1 | M1 | Low  |
| ZA4295870 | Alive | 32 | Male   | 63 | 19.92 | Well     | 6   | <b>IIIA</b> | T2 | N1 | M0 | High |
| 34106097  | Alive | 33 | Male   | 54 | 22.99 | Moderate | 3.2 | <b>I</b>    | T2 | N0 | M0 | Low  |
| ZA4407660 | Alive | 32 | Female | 65 | 17.48 | Moderate | 4.3 | <b>II B</b> | T4 | N0 | M0 | High |
| ZA0289648 | Alive | 32 | Female | 45 | 20.69 | Moderate | 4.5 | <b>I</b>    | T1 | N0 | M0 | High |
| 34118018  | Alive | 31 | Female | 23 | 19.98 | Moderate | 3.5 | <b>II A</b> | T3 | N0 | M0 | Low  |
| 34117683  | Alive | 32 | Male   | 74 | 22.1  | Moderate | 3.1 | <b>I</b>    | T2 | N0 | M0 | Low  |
| 34096260  | Dead  | 12 | Female | 80 | 18.9  | Moderate | 3.8 | <b>IV</b>   | T4 | N0 | M1 | Low  |
| ZA0799850 | Alive | 32 | Male   | 62 | 21.41 | Moderate | 4   | <b>I</b>    | T2 | N0 | M0 | Low  |
| 34117878  | Alive | 31 | Female | 24 | 14.57 | Moderate | 3.5 | <b>IIIB</b> | T4 | N1 | M0 | Low  |
| ZA4420755 | Alive | 31 | Female | 73 | 16.65 | Poor     | 12  | <b>II B</b> | T4 | N0 | M0 | Low  |
| 34124426  | Alive | 32 | Male   | 55 | 21.77 | Moderate | 1   | <b>II B</b> | T4 | N0 | M0 | Low  |
| 34121819  | Dead  | 6  | Male   | 53 | 25.73 | Well     | 5   | <b>IIIB</b> | T4 | N1 | M0 | Low  |
| 34122964  | Dead  | 11 | Male   | 62 | 21    | Moderate | 4   | <b>IV</b>   | T4 | N1 | M1 | High |
| ZA4420640 | Dead  | 21 | Male   | 59 | 23.83 | Well     | 2.5 | <b>IV</b>   | T4 | N1 | M1 | Low  |
| 34123925  | Alive | 30 | Male   | 65 | 16.61 | Well     | 7   | <b>II B</b> | T4 | N0 | M0 | Low  |
| 34071486  | Alive | 31 | Male   | 65 | 21.11 | Well     | 4.5 | <b>II B</b> | T4 | N0 | M0 | Low  |
| 34126856  | Dead  | 5  | Female | 64 | 26.77 | Moderate | 5   | <b>IIIC</b> | T4 | N2 | M0 | Low  |
| ZA4283302 | Alive | 31 | Male   | 64 | 20.28 | Moderate | 3.5 | <b>I</b>    | T2 | N0 | M0 | Low  |
| 34123915  | Alive | 31 | Male   | 63 | 19.1  | Well     | 4.2 | <b>II B</b> | T4 | N0 | M0 | High |
| ZA4385531 | Alive | 31 | Female | 63 | 22.22 | Well     | 3   | <b>IIIB</b> | T4 | N1 | M0 | Low  |
| ZA4343531 | Alive | 31 | Male   | 49 | 24.06 | Moderate | 4   | <b>IIIB</b> | T4 | N1 | M0 | Low  |
| ZA4421152 | Alive | 31 | Female | 60 | 20.35 | Moderate | 7   | <b>II B</b> | T4 | N0 | M0 | High |
| 34129241  | Alive | 31 | Male   | 46 | 19.72 | Moderate | 6   | <b>II A</b> | T3 | N0 | M0 | Low  |
| 34130684  | Dead  | 20 | Male   | 60 | 21.77 | Moderate | 6   | <b>IIIB</b> | T4 | N1 | M0 | High |
| ZA4397058 | Alive | 30 | Male   | 45 | 25.47 | Moderate | 4   | <b>I</b>    | T2 | N0 | M0 | Low  |

|           |       |    |        |    |       |          |     |              |    |    |    |      |
|-----------|-------|----|--------|----|-------|----------|-----|--------------|----|----|----|------|
| 34131920  | Alive | 30 | Female | 62 | 21.37 | Moderate | 4   | <b>II B</b>  | T4 | N0 | M0 | High |
| QA0026060 | Alive | 31 | Male   | 72 | 24.22 | Moderate | 4   | <b>I</b>     | T1 | N0 | M0 | Low  |
| ZA0703048 | Dead  | 31 | Female | 52 | 21.3  | Moderate | 6   | <b>IV</b>    | T4 | N1 | M1 | High |
| ZA4260759 | Alive | 30 | Female | 58 | 25.45 | Well     | 4   | <b>II B</b>  | T4 | N0 | M0 | High |
| QA0027420 | Alive | 30 | Female | 50 | 21.64 | Moderate | 3   | <b>III B</b> | T4 | N1 | M0 | Low  |
| YB0030239 | Dead  | 30 | Male   | 74 | 22.49 | Moderate | 7   | <b>III B</b> | T4 | N1 | M0 | High |
| ZA4385196 | Alive | 30 | Female | 46 | 16.65 | Moderate | 1   | <b>II B</b>  | T4 | N0 | M0 | Low  |
| 34131041  | Dead  | 2  | Male   | 60 | 25.71 | Moderate | 7   | <b>III B</b> | T4 | N1 | M0 | Low  |
| ZA4258635 | Alive | 30 | Female | 64 | 19.74 | Moderate | 2   | <b>III B</b> | T4 | N1 | M0 | Low  |
| 34134672  | Alive | 30 | Male   | 68 | 20.58 | Well     | 2   | <b>III C</b> | T2 | N2 | M0 | Low  |
| ZA4271938 | Dead  | 2  | Female | 54 | 27.11 | Moderate | 6.5 | <b>II B</b>  | T4 | N0 | M0 | Low  |
| 33646671  | Dead  | 1  | Female | 59 | 22.51 | Moderate | 2.5 | <b>II B</b>  | T4 | N0 | M0 | High |
| 34139935  | Alive | 30 | Male   | 37 | 21.12 | Moderate | 5   | <b>II B</b>  | T4 | N0 | M0 | Low  |
| ZA4186480 | Alive | 30 | Male   | 75 | 19.49 | Moderate | 3   | <b>III A</b> | T2 | N1 | M0 | Low  |
| ZA2120631 | Alive | 30 | Female | 49 | 24.99 | Moderate | 5   | <b>II B</b>  | T4 | N0 | M0 | Low  |
| ZA4980393 | Alive | 30 | Female | 69 | 21.08 | Moderate | 7   | <b>II B</b>  | T4 | N0 | M0 | Low  |
| ZA4320832 | Dead  | 28 | Female | 58 | 18.3  | Moderate | 10  | <b>III B</b> | T4 | N1 | M0 | Low  |
| ZA5095424 | Alive | 30 | Female | 63 | 22.48 | Well     | 3.5 | <b>II B</b>  | T4 | N0 | M0 | Low  |
| ZA4981715 | Alive | 30 | Female | 73 | 22.89 | Well     | 4.5 | <b>I</b>     | T2 | N0 | M0 | High |
| ZA4442046 | Alive | 31 | Female | 52 | 24.56 | Moderate | 4   | <b>II A</b>  | T3 | N0 | M0 | High |
| ZA4981952 | Alive | 30 | Female | 72 | 22.39 | Well     | 5.5 | <b>II A</b>  | T3 | N0 | M0 | Low  |
| 34145162  | Alive | 30 | Female | 72 | 25.56 | Moderate | 10  | <b>II B</b>  | T4 | N0 | M0 | Low  |
| ZA4997952 | Alive | 30 | Female | 52 | 20.76 | Moderate | 4.5 | <b>III C</b> | T4 | N2 | M0 | Low  |
| YB0054517 | Dead  | 15 | Female | 72 | 26    | Moderate | 3   | <b>II B</b>  | T4 | N0 | M0 | Low  |
| ZA5094436 | Alive | 32 | Male   | 70 | 19.72 | Moderate | 4   | <b>II B</b>  | T4 | N0 | M0 | Low  |
| 34148948  | Alive | 30 | Male   | 60 | 24.2  | Moderate | 1   | <b>III B</b> | T4 | N1 | M0 | Low  |
| 34148362  | Dead  | 12 | Male   | 27 | 18.51 | Poor     | 5.5 | <b>III B</b> | T4 | N1 | M0 | Low  |

|            |       |    |        |    |       |          |     |              |    |    |    |      |
|------------|-------|----|--------|----|-------|----------|-----|--------------|----|----|----|------|
| 34148948   | Alive | 12 | Male   | 60 | 24.2  | Moderate | 8   | <b>III B</b> | T4 | N1 | M0 | High |
| ZA42843024 | Alive | 30 | Male   | 82 | 19.71 | Moderate | 7   | <b>II A</b>  | T3 | N0 | M0 | High |
| 34153281   | Alive | 30 | Female | 66 | 24.89 | Moderate | 5   | <b>I</b>     | T2 | N0 | M0 | High |
| ZA3558869  | Alive | 37 | Male   | 30 | 24.11 | Poor     | 5.5 | <b>III B</b> | T4 | N0 | M0 | High |
| 34157140   | Alive | 37 | Male   | 26 | 16.23 | Moderate | 2.5 | <b>II B</b>  | T4 | N0 | M0 | High |
| YB0017557  | Alive | 37 | Male   | 58 | 26.56 | Moderate | 4   | <b>II B</b>  | T4 | N0 | M0 | High |
| 34153574   | Alive | 37 | Male   | 66 | 25    | Well     | 5.4 | <b>I</b>     | T2 | N0 | M0 | High |
| ZA4990052  | Dead  | 5  | Male   | 46 | 19.9  | Moderate | 4   | <b>III C</b> | T4 | N2 | M0 | High |
| 34155419   | Alive | 37 | Female | 74 | 24.99 | Well     | 8   | <b>III B</b> | T4 | N1 | M0 | High |
| 34115494   | Alive | 37 | Female | 56 | 22.43 | Moderate | 6   | <b>II A</b>  | T3 | N0 | M0 | High |
| 34163311   | Dead  | 20 | Female | 65 | 21.57 | Moderate | 4   | <b>II B</b>  | T4 | N0 | M0 | Low  |
| 34159093   | Alive | 30 | Male   | 77 | 16    | Moderate | 5   | <b>III C</b> | T4 | N2 | M0 | Low  |
| ZA5081192  | Alive | 20 | Male   | 51 | 19.49 | Well     | 11  | <b>III B</b> | T3 | N1 | M0 | High |
| ZA4250352  | Dead  | 9  | Male   | 69 | 17.3  | Moderate | 4   | <b>II B</b>  | T4 | N0 | M0 | High |
| 34161552   | Alive | 36 | Male   | 68 | 21.3  | Moderate | 4   | <b>I</b>     | T2 | N0 | M0 | High |
| 34157378   | Dead  | 17 | Male   | 57 | 22.65 | Moderate | 10  | <b>IV</b>    | T3 | N0 | M1 | High |
| ZA5066485  | Dead  | 7  | Female | 46 | 20.93 | Poor     | 4   | <b>III B</b> | T4 | N1 | M0 | High |
| 34164588   | Alive | 36 | Female | 70 | 23.52 | Moderate | 7   | <b>II B</b>  | T4 | N0 | M0 | High |
| ZA4250546  | Alive | 36 | Male   | 61 | 25.88 | Moderate | 5   | <b>II B</b>  | T3 | N0 | M0 | High |
| ZA4250431  | Alive | 36 | Male   | 34 | 16.63 | Moderate | 7   | <b>III B</b> | T4 | N1 | M0 | High |
| ZA3841082  | Dead  | 13 | Female | 64 | 27.47 | Moderate | 6.5 | <b>IV</b>    | T4 | N0 | M1 | High |
| 34107021   | Dead  | 14 | Male   | 59 | 24.22 | Moderate | 2.7 | <b>IV</b>    | T4 | N0 | M1 | High |
| 34169458   | Alive | 30 | Male   | 69 | 19.25 | Moderate | 3   | <b>III B</b> | T4 | N1 | M0 | Low  |
| QA0017262  | Alive | 30 | Male   | 74 | 23    | Moderate | 4   | <b>I</b>     | T1 | N0 | M0 | High |
| ZA4280678  | Alive | 30 | Female | 70 | 23.56 | Moderate | 4   | <b>II B</b>  | T4 | N0 | M0 | High |
| 34096882   | Alive | 30 | Female | 53 | 23.44 | Moderate | 3   | <b>II B</b>  | T4 | N0 | M0 | Low  |
| 34172034   | Alive | 30 | Male   | 62 | 20.69 | Well     | 1   | <b>II B</b>  | T4 | N0 | M0 | Low  |

|           |       |    |        |    |       |          |     |              |     |    |    |      |
|-----------|-------|----|--------|----|-------|----------|-----|--------------|-----|----|----|------|
| 34107696  | Alive | 30 | Female | 51 | 23.9  | Poor     | 1   | <b>II B</b>  | T4  | N0 | M0 | Low  |
| 34104924  | Alive | 30 | Male   | 63 | 23    | Moderate | 3.5 | <b>II A</b>  | T3  | N0 | M0 | High |
| 34170567  | Alive | 30 | Male   | 61 | 25.95 | Well     | 4   | <b>I</b>     | Tis | N0 | M0 | High |
| 34172606  | Alive | 30 | Male   | 56 | 22    | Moderate | 2   | <b>III B</b> | T4  | N1 | M0 | Low  |
| 34121663  | Alive | 30 | Male   | 39 | 24    | Well     | 3   | <b>II B</b>  | T4  | N0 | M0 | Low  |
| QA0027745 | Alive | 30 | Male   | 65 | 25.46 | Moderate | 1   | <b>III B</b> | T3  | N1 | M0 | Low  |
| ZA4766148 | Dead  | 29 | Male   | 75 | 21.45 | Well     | 4   | <b>II B</b>  | T4  | N0 | M0 | High |
| 34176212  | Dead  | 32 | Male   | 43 | 31.22 | Well     | 3   | <b>III C</b> | T3  | N2 | M0 | High |
| ZA3610021 | Alive | 30 | Male   | 57 | 18    | Well     | 4   | <b>II B</b>  | T4  | N0 | M0 | Low  |
| ZA4764251 | Alive | 30 | Male   | 40 | 25.39 | Poor     | 6.5 | <b>III B</b> | T4  | N1 | M0 | Low  |
| 33488273  | Alive | 30 | Female | 64 | 23.51 | Poor     | 7   | <b>II B</b>  | T4  | N0 | M0 | Low  |
| 34091177  | Dead  | 29 | Male   | 48 | 24.49 | Moderate | 7   | <b>II A</b>  | T3  | N0 | M0 | High |
